# Supplementary material for: A Supramolecular Approach to Enhance the Optoelectronic Properties of P3HT-b-PEG Block Copolymer for Organic Field-Effect Transistors
Source: PubMed Central journal article supplement (PMC11411656; doi:10.1021/acsomega.4c05648), 2024-09-03
Supplement: ao4c05648_si_001.pdf [file ao4c05648_si_001.pdf]

## Supporting Information

### A supramolecular approach to enhance the optoelectronic properties of P3HT-b-PEG block copolymer for organic field effect transistor

Pallavi Kumari<sup>1\*</sup>, Barbara Hajduk<sup>1</sup>, Paweł Jarka<sup>2</sup>, Henryk Bednarski<sup>1</sup>, Henryk Janeczek<sup>1</sup>, Mieczysław Łapkowski<sup>1,3</sup> Sylwia Waśkiewicz<sup>3</sup>

<sup>1</sup>Centre of Polymer and Carbon Materials, Polish Academy of Sciences, 34 Marie Curie Skłodowska Str., 41–819 Zabrze, Poland

<sup>2</sup>Department of Engineering Materials and Biomaterials, Silesian University of Technology, 18a Konarskiego Str., 41–100 Gliwice, Poland

<sup>3</sup>Department of Physical Chemistry and Technology of Polymers, Faculty of Chemistry, Silesian University of Technology, M. Strzody 9, 44–100 Gliwice, Poland

**\*Correspondence:** Pallavi Kumari

**\*E-mail:** pkumari@cmpw-pan.pl

#### **Co-author's E-mail:**

(B.H.): bhajduk@cmpw-pan.pl

(P.J.): pawel.jarka@polsl.pl

(H.B.): hbednarski@cmpw-pan.pl

(H.J.): hjaneczek@cmpw-pan.pl

(M.Ł.): mieczyslaw.lapkowski@polsl.pl

(S.W.): sylwia.waskiewicz@polsl.pl

Results:

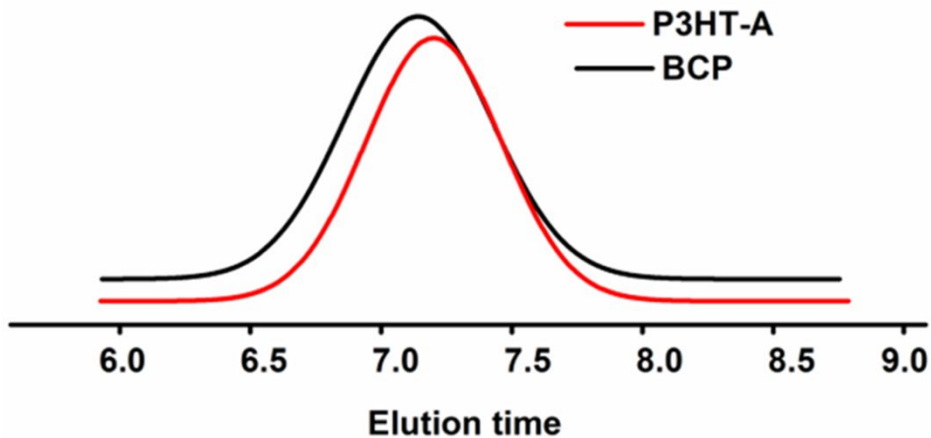

Figure S1

Fig. S1. GPC traces of poly-3-hexyl thiophene (P3HT-A) and block copolymer (BCP).

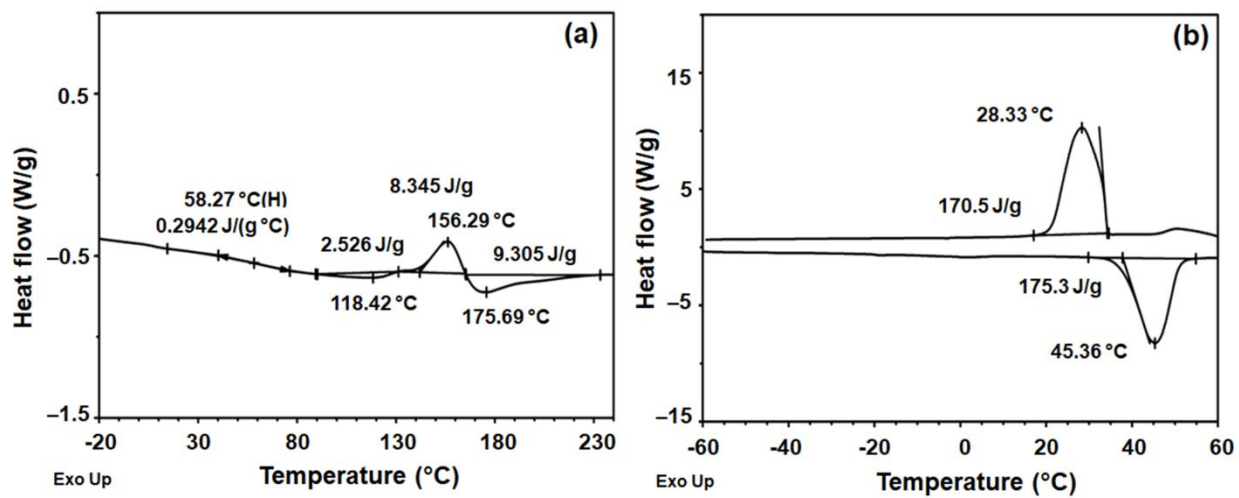

Figure S2

Fig. S2. Differential scanning calorimetric of powder (a) Perylenediimide butyric acid (PDIBA) and (b) Polyethylene glycol

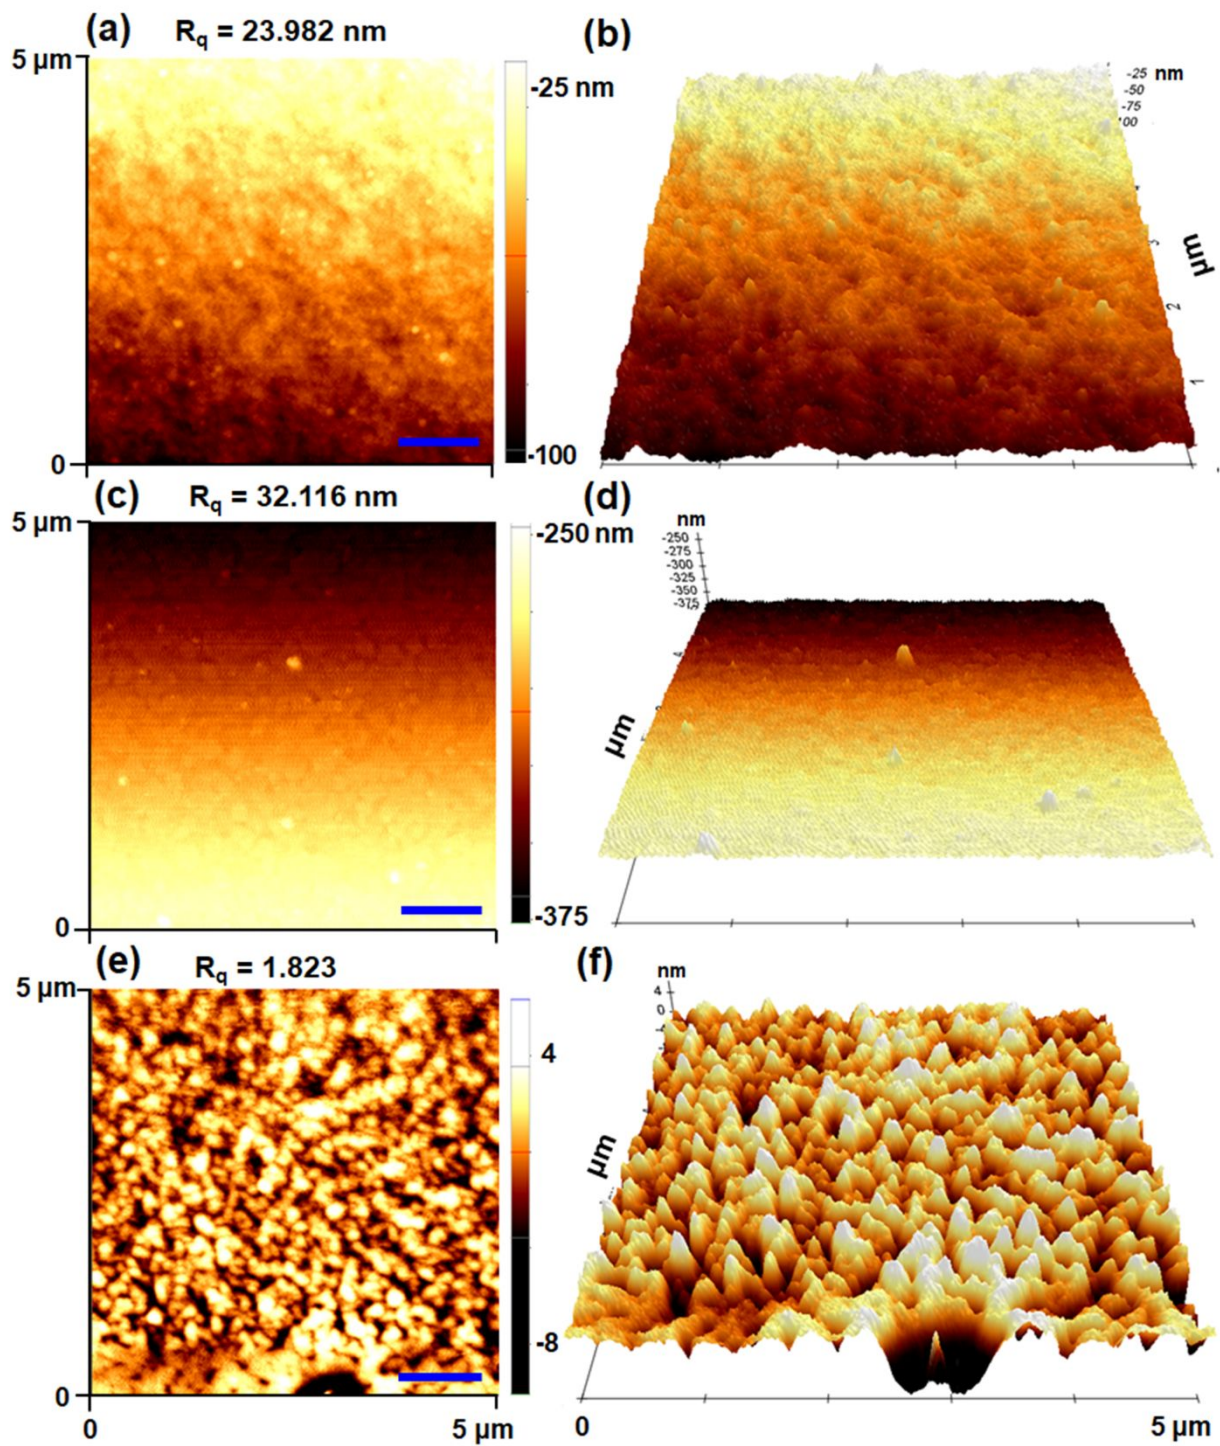

Figure S3

**Fig. S3.** Atomic force micrographs (5×5 micrometer) of thin films as cast **(a, b)** poly(3-hexylthiophene)-alkyne (P3HT-A), **(c, d)** block copolymers (BCP), and **(e, f)** supramolecular block copolymer (SBCP) prepared by drop casting from toluene (Bar = 1000 nm).

**Table S1.** Thermal properties of the synthesized poly(3-hexylthiophene)-alkyne (P3HT-A), block copolymers (BCP), and supramolecular block copolymer (SBCP) films prepared by 10 mg mL<sup>-1</sup> toluene and powder of carboxyl-functionalized perylene diimide (PDIBA) and polyethylene glycol (PEG).

| <b>Sample</b> | <b>T<sub>m</sub> (°C)</b> | <b>T<sub>c</sub> (°C)</b> | <b>T<sub>g</sub> (°C)</b> | <b>ΔH<sub>m</sub> (J/g)</b> |
|---------------|---------------------------|---------------------------|---------------------------|-----------------------------|
| <b>P3HT-A</b> | 230                       | 162                       | 20                        | 22.6                        |
| <b>PEG</b>    | 54                        | -                         | -                         | 193.6                       |
| <b>PDIBA</b>  | 199                       | -                         | 63                        | 10.7                        |
| <b>SBCP</b>   | 234                       | 188                       | 106                       | 25.28                       |
| <b>BCP</b>    | 221                       | 167                       | -                         | 7.82                        |
